# Supplementary material for: Interleukin-33 Induces Neutrophil Extracellular Trap (NET) Formation and Macrophage Necroptosis via Enhancing Oxidative Stress and Secretion of Proatherogenic Factors in Advanced Atherosclerosis
Source: MDPI journal article supplement (doi:10.3390/antiox11122343), 2022-11-26
Supplement: s1 [file s1]

**Table S1: Effect size analysis of all the test parameters reported in the study**

| Test parameters                                                                  | aAT<br>Mean ± SD | Control<br>Mean ± SD | Cohen's d (Effect size)<br>(95% confidence Interval<br>lower, Upper) |
|----------------------------------------------------------------------------------|------------------|----------------------|----------------------------------------------------------------------|
| <b>Oxidative Stress markers (Calorimetric method based assay)</b>                |                  |                      |                                                                      |
| 8-OHdG<br>(ng/ml)                                                                | 20.467± 12.294   | 8.725± 7.255         | 1.163<br>(0.744, 1.577)                                              |
| MDA<br>(nmol/ml)                                                                 | 8.376± 4.938     | 5.815± 2.776         | 0.640<br>(0.244, 1.032)                                              |
| GSH-GSSG ratio                                                                   | 7.462±4.335      | 4.884± 2.787         | 0.707<br>(0.308, 1.108)                                              |
| SOD<br>(Units/mg)                                                                | 9.469± 6.802     | 16.742± 11.031       | -0.793<br>(-1.191, -0.392)                                           |
| CATALASE<br>(Units/mg)                                                           | 16.584± 14.987   | 41.531± 37.051       | -0.883<br>(-1.283, -0.477)                                           |
| <b>Atherogenic factors in treated macrophages (Transcript, 2<sup>-ΔCt</sup>)</b> |                  |                      |                                                                      |
| <i>IFN-γ</i>                                                                     | 0.0018± 0.0024   | 0.0004± 0.0003       | 0.833<br>(0.4297, 1.2316)                                            |
| <i>TNFα</i>                                                                      | 0.0074±0 .0180   | 0.0013±0.0022        | 0.476<br>(0.0857, 0.8654)                                            |
| <i>IL-1β</i>                                                                     | 0.0051±0.0114    | 0.0016± .0015        | 0.438<br>(0.0481, 0.8262)                                            |
| <i>IL-6</i>                                                                      | 0.0128± 0.0215   | 0.0027± 0.0026       | 0.622<br>(0.2657, 1.0556)                                            |
| <i>IL-10</i>                                                                     | 0.0022± 0.0024   | 0.0031± 0.0039       | -0.284<br>(-0.6698, 0.1028)                                          |
| <i>IL-12B</i>                                                                    | 0.0006±0.0006    | 0.0004± 0.0006       | 0.298<br>(-0.0897, 0.6833)                                           |
| <i>IL-18</i>                                                                     | 0.0075± 0.0162   | 0.0044± 0.0098       | 0.239<br>(-0.1468, 0.6247)                                           |
| <i>IL-23</i>                                                                     | 0.0089± 0.0133   | 0.0029± 0.0038       | 0.600<br>(0.2059, 0.9921)                                            |
| <i>IL-33</i>                                                                     | 0.0020± 0.0019   | 0.0012± 0.0015       | 0.463<br>(0.0726, 0.8518)                                            |
| <i>MCP1</i>                                                                      | 0.0013± 0.0019   | 0.0005± 0.0009       | 0.513<br>(0.1212, 0.9028)                                            |
| <i>GMCSF</i>                                                                     | 0.0019± 0.0038   | 0.0009± 0.0015       | 0.346<br>(-0.0426, 0.7320)                                           |
| <b>Expression in neutrophils (Transcript, 2<sup>-ΔCt</sup>)</b>                  |                  |                      |                                                                      |
| MPO                                                                              | 0.0022± 0.0047   | 0.0003± 0.0006       | 0.569<br>(0.1761, 0.9605)                                            |
| IL-33R                                                                           | 0.0053± 0.0095   | .0014± .0025         | 0.562<br>(.1687, .9528)                                              |
| <b>Necroptosis markers in treated macrophages (Transcript, 2<sup>-ΔCt</sup>)</b> |                  |                      |                                                                      |
| <i>RIPK1</i>                                                                     | 0.0021± 0.0039   | 0.0013± 0.0021       | 0.239<br>(-0.1466, 0.6249)                                           |
| <i>RIPK3</i>                                                                     | 0.0037± 0.0082   | 0.0025± 0.0052       | 0.186<br>(-0.2001, 0.5703)                                           |
| <i>MLKL</i>                                                                      | 0.0040±0.0025    | 0.0049± 0.0092       | -0.137<br>(-0.5218, 0.2478)                                          |
| <b>Inflammasomes (Transcript, 2<sup>-ΔCt</sup>)</b>                              |                  |                      |                                                                      |

|                                                      |                |                |                              |
|------------------------------------------------------|----------------|----------------|------------------------------|
| <i>AIM2</i>                                          | 0.005±0.0093   | 0.0034±0.0039  | 0.242<br>(-0.1437, 0.6278)   |
| <i>NLRP1</i>                                         | 0.0032±0.0032  | 0.0021±0.0023  | 0.389<br>(0.00023, 0.7763)   |
| <i>NLRP3</i>                                         | 0.0095±.0181   | 0.0041±0.0075  | 0.390<br>(0.0014, 0.7775)    |
| <i>NLRC4</i>                                         | 0.0161±0.0256  | 0.0039±0.0049  | 0.657<br>(0.2609, 1.0504)    |
| <b>TIMPs and MMPs (Transcript, 2<sup>-ΔCt</sup>)</b> |                |                |                              |
| <i>TIMP1</i>                                         | 0.0046± 0.0090 | 0.0151± 0.0255 | -0.547<br>(-0.9377, -0.1544) |
| <i>TIMP2</i>                                         | 0.0039± 0.0057 | 0.0075± 0.0120 | -0.371<br>(-0.7578, 0.0175)  |
| <i>TIMP3</i>                                         | 0.0012± 0.0019 | 0.0028± 0.0042 | -0.495<br>(-0.8843, -0.1037) |
| <i>TIMP4</i>                                         | 0.0038± 0.0055 | 0.0076± 0.0141 | -0.348<br>(-0.7348, 0.0398)  |
| <i>MMP-1</i>                                         | 0.0017± 0.0024 | 0.0013± 0.0018 | 0.232<br>(-.1541, .6173)     |
| <i>MMP-2</i>                                         | 0.0019± 0.0027 | 0.0013± 0.0024 | 0.233<br>(-0.1530, 0.6183)   |
| <i>MMP-3</i>                                         | 0.0081± 0.0180 | 0.0017± 0.0028 | 0.491<br>(0.1004, 0.8809)    |
| <i>MMP-7</i>                                         | 0.0032±0.0078  | 0.0017± 0.0030 | 0.241<br>(-0.1445, 0.6270)   |
| <i>MMP-9</i>                                         | 0.0012± 0.0023 | 0.0006± 0.0015 | 0.330<br>(-0.0578, 0.7162)   |
| <i>MMP-12</i>                                        | 0.0069± 0.0273 | 0.0022±0.0057  | 0.234<br>(-0.1519, 0.6195)   |
| <i>MMP-13</i>                                        | 0.0046± 0.0134 | 0.0009± 0.0019 | 0.383<br>(-0.0049, .7710)    |
| <i>MMP-14</i>                                        | 0.0019± 0.0022 | 0.0016± 0.0021 | 0.135<br>(-0.2490, 0.5206)   |
| <b>ELISA based protein quantification data</b>       |                |                |                              |
| MPO (PLAQUE)<br>(pg/ml)                              | 283.4 ± 169.7  | --             | --                           |
| IL-33R (PLAQUE)<br>(pg/ml)                           | 76.08 ± 50.29  | --             | --                           |
| RIPK-1<br>(ng/ml)                                    | 0.492 ± 0.384  | 0.849 ± 0.575  | 0.730<br>(.3317, 1.1261)     |
| RIPK-3<br>(ng/ml)                                    | 1.511± 0.955   | 1.040± 0.551   | 0.604<br>(.2089, .9953)      |
| MLKL<br>(ng/ml)                                      | 2.597± 2.10    | 1.822± 0.910   | 0.701<br>(.3030, 1.0954)     |
